# Supplementary material for: Genetic Association for Renal Traits among Participants of African Ancestry Reveals New Loci for Renal Function
Source: PubMed Central journal article supplement (PMC3169523; doi:10.1371/journal.pgen.1002264), 2011-09-08

rs267734 ( YRI )

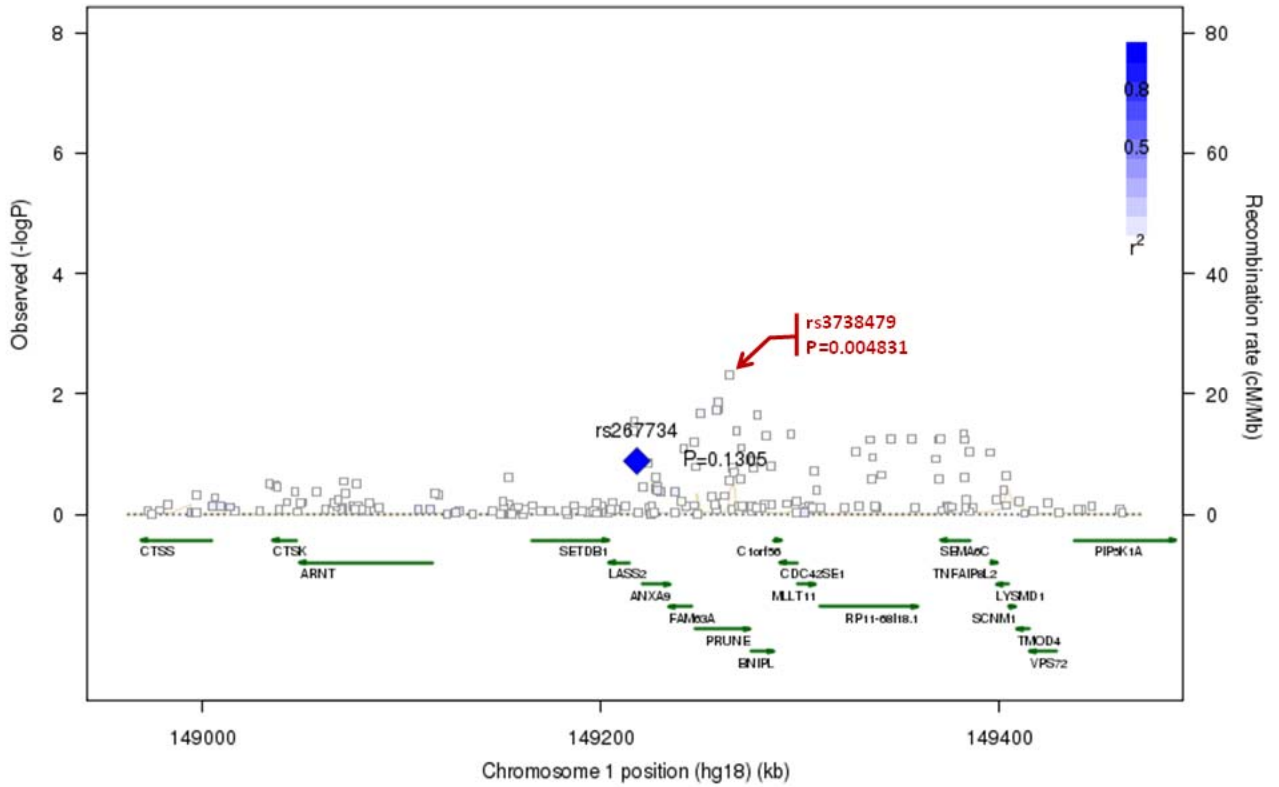

rs1260326 ( YRI )

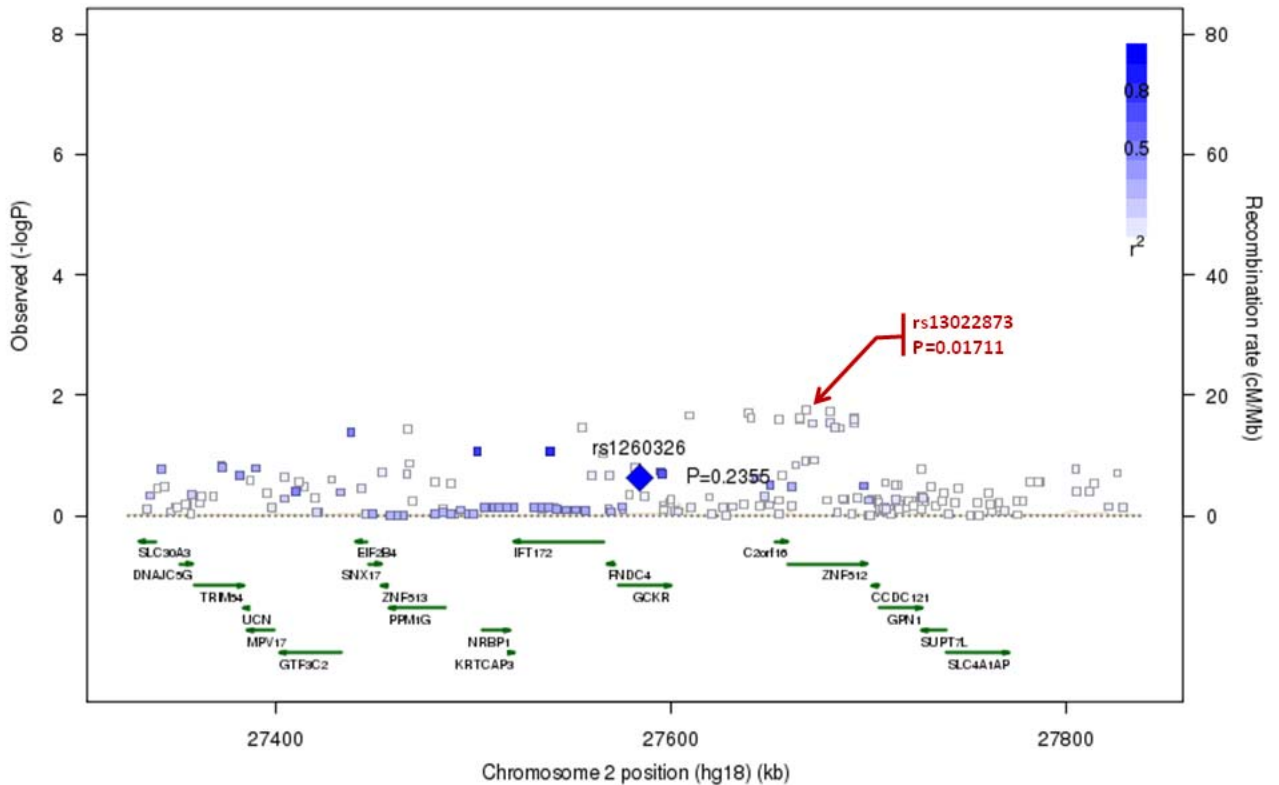

rs347685 ( YRI )

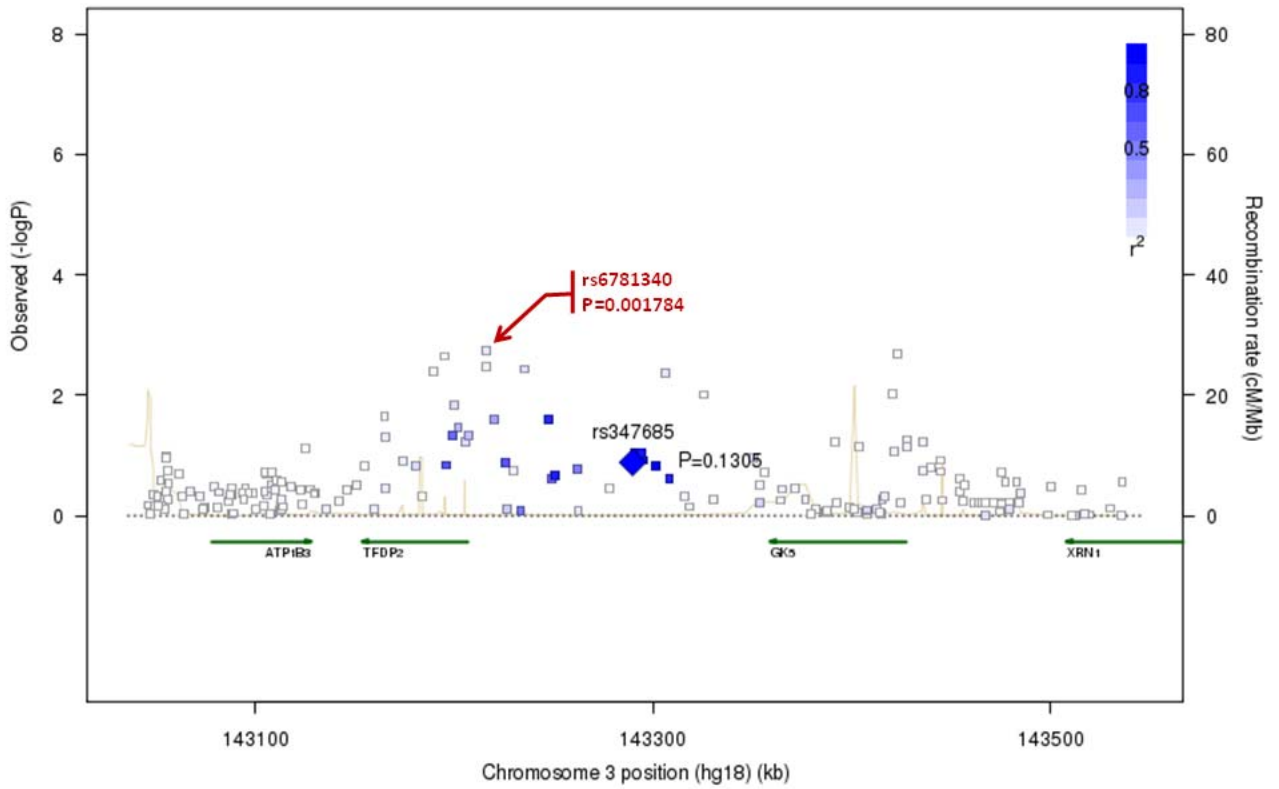

rs11959928 ( YRI )

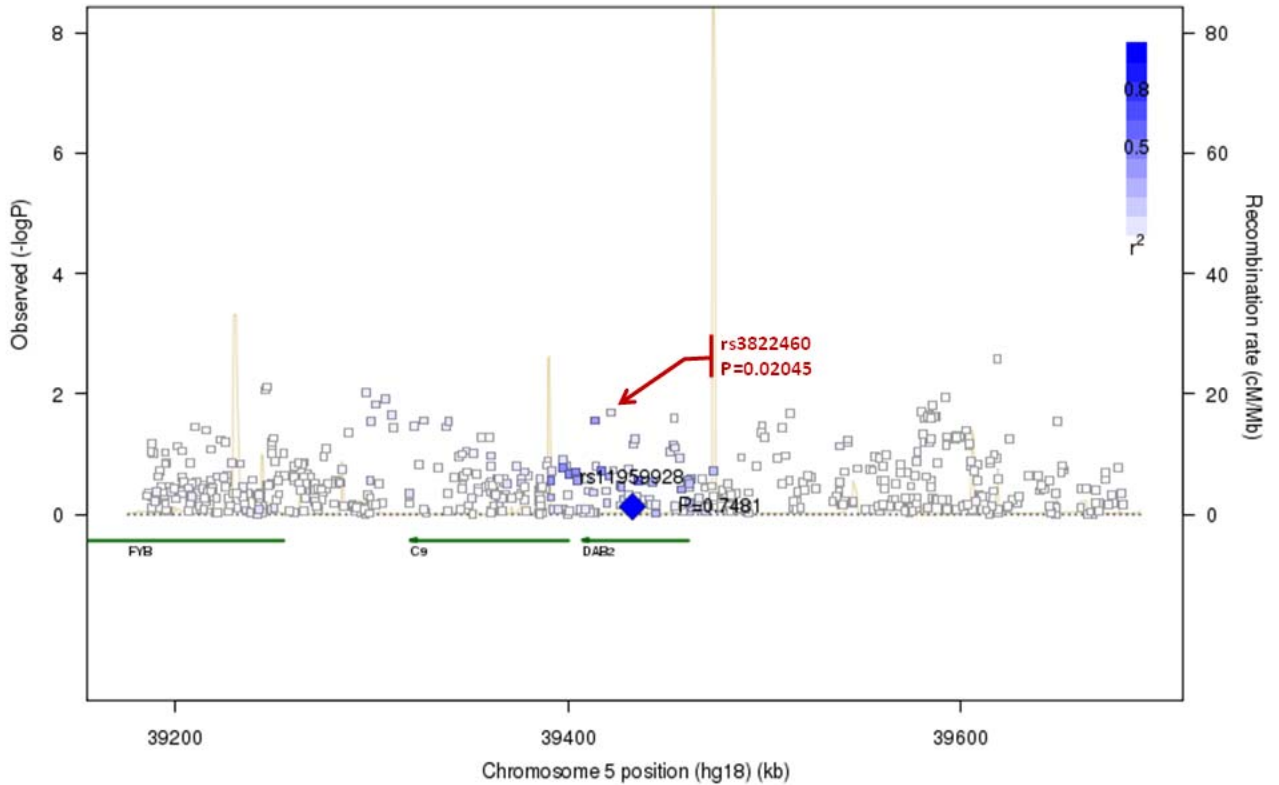

### rs881858 ( YRI )

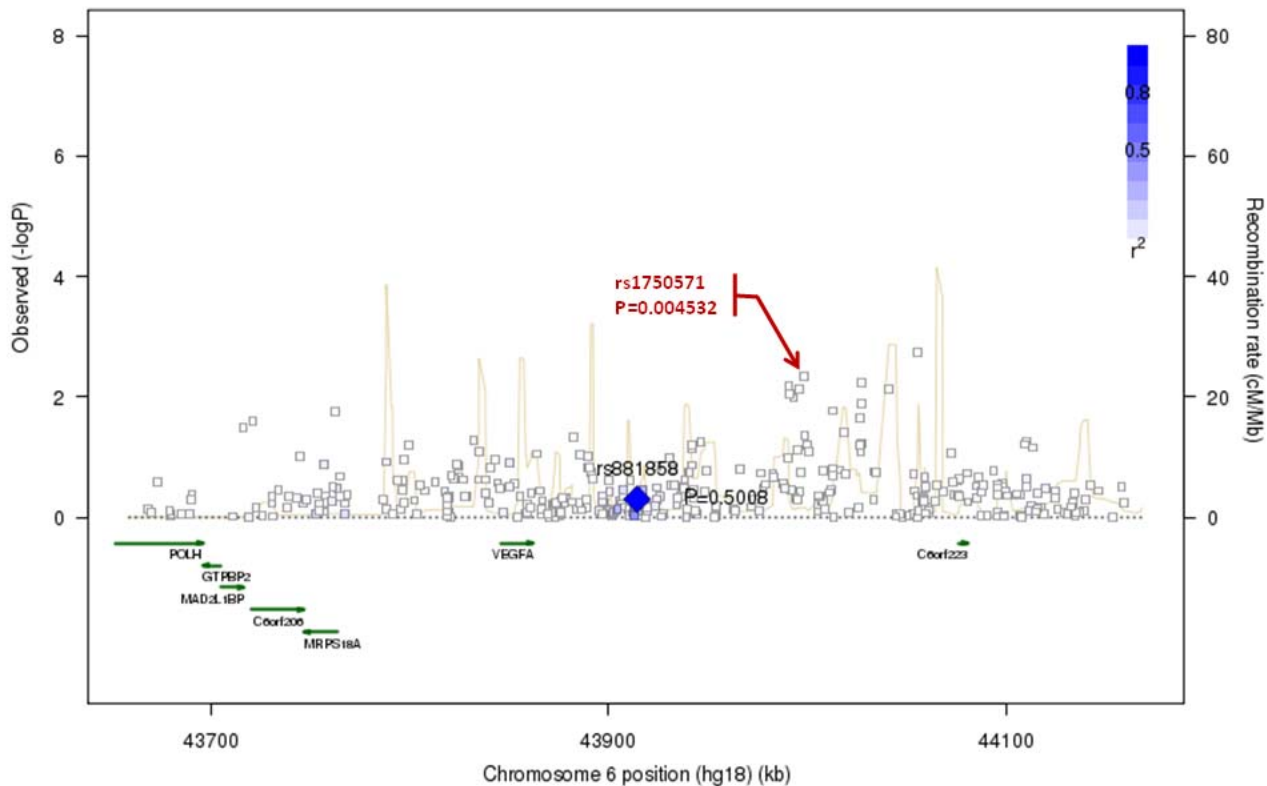

### rs2279463 ( YRI )

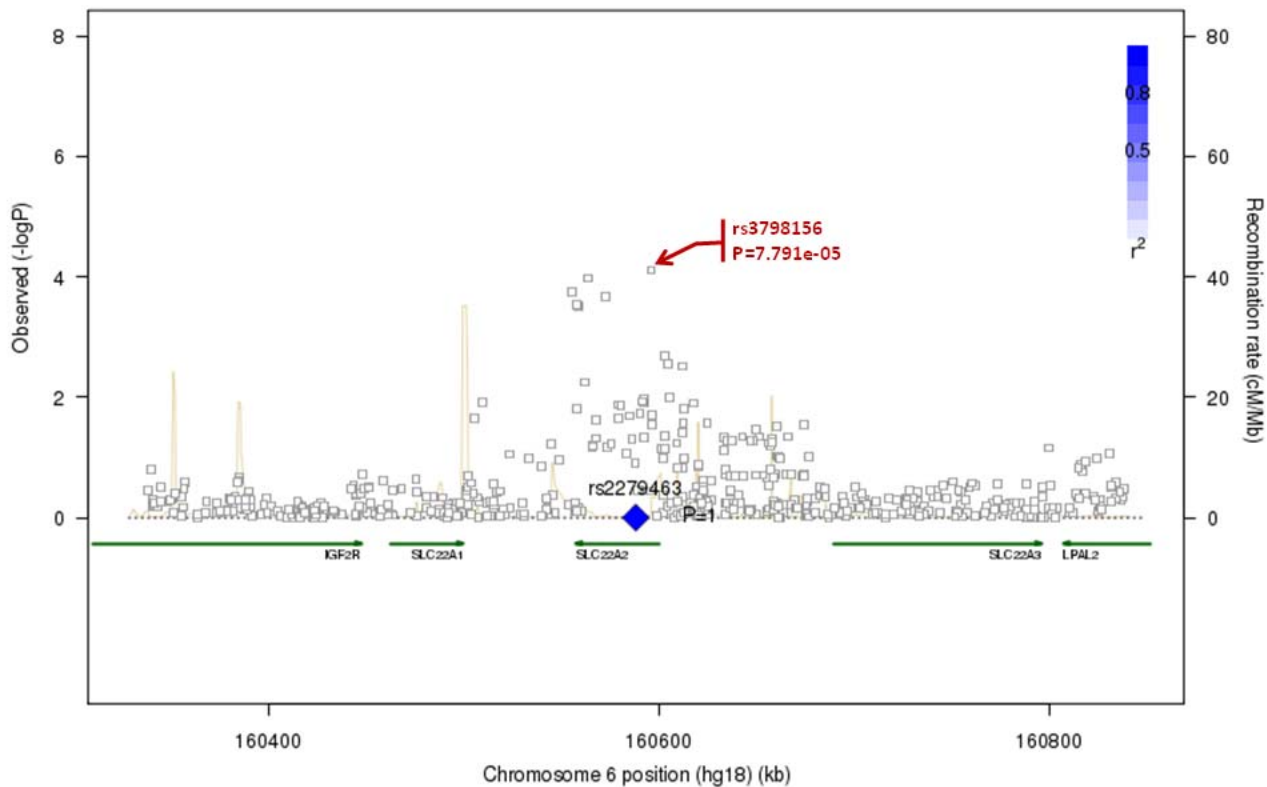

rs6465825 ( YRI )

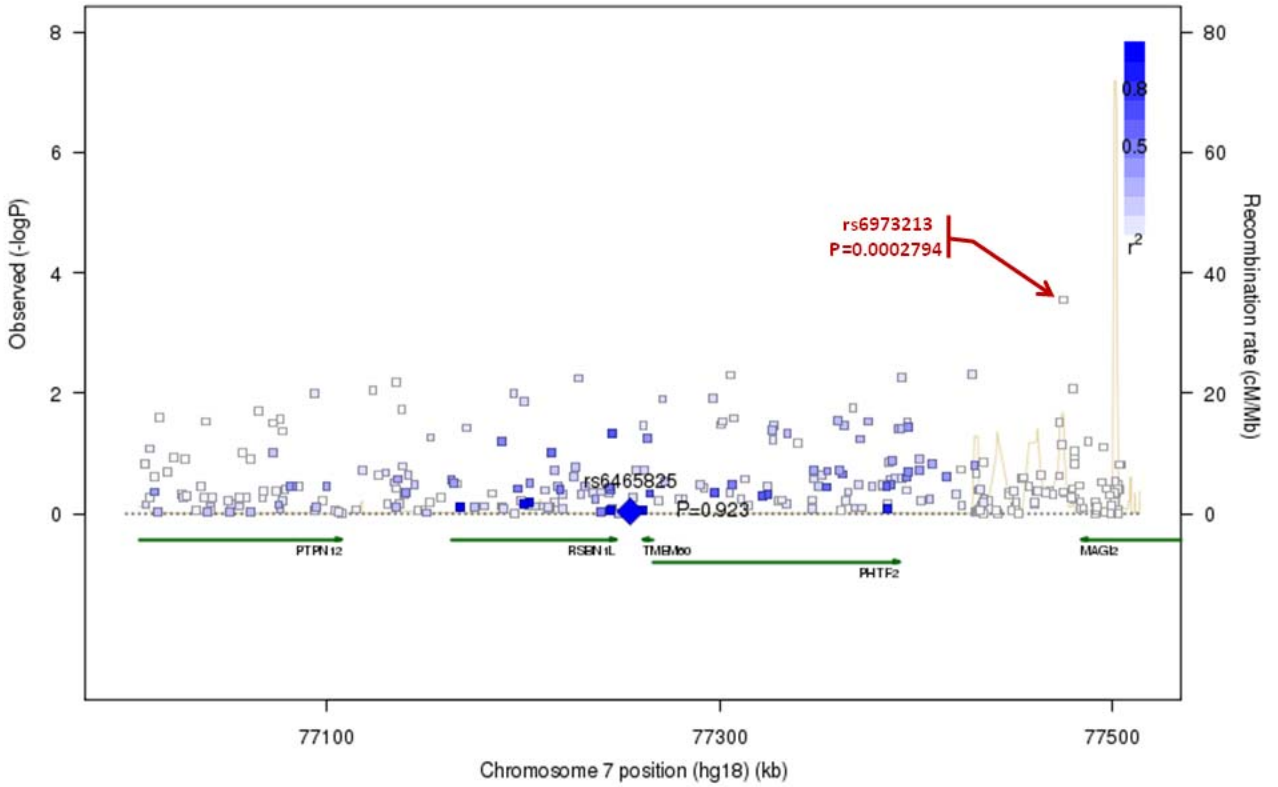

rs4744712 ( YRI )

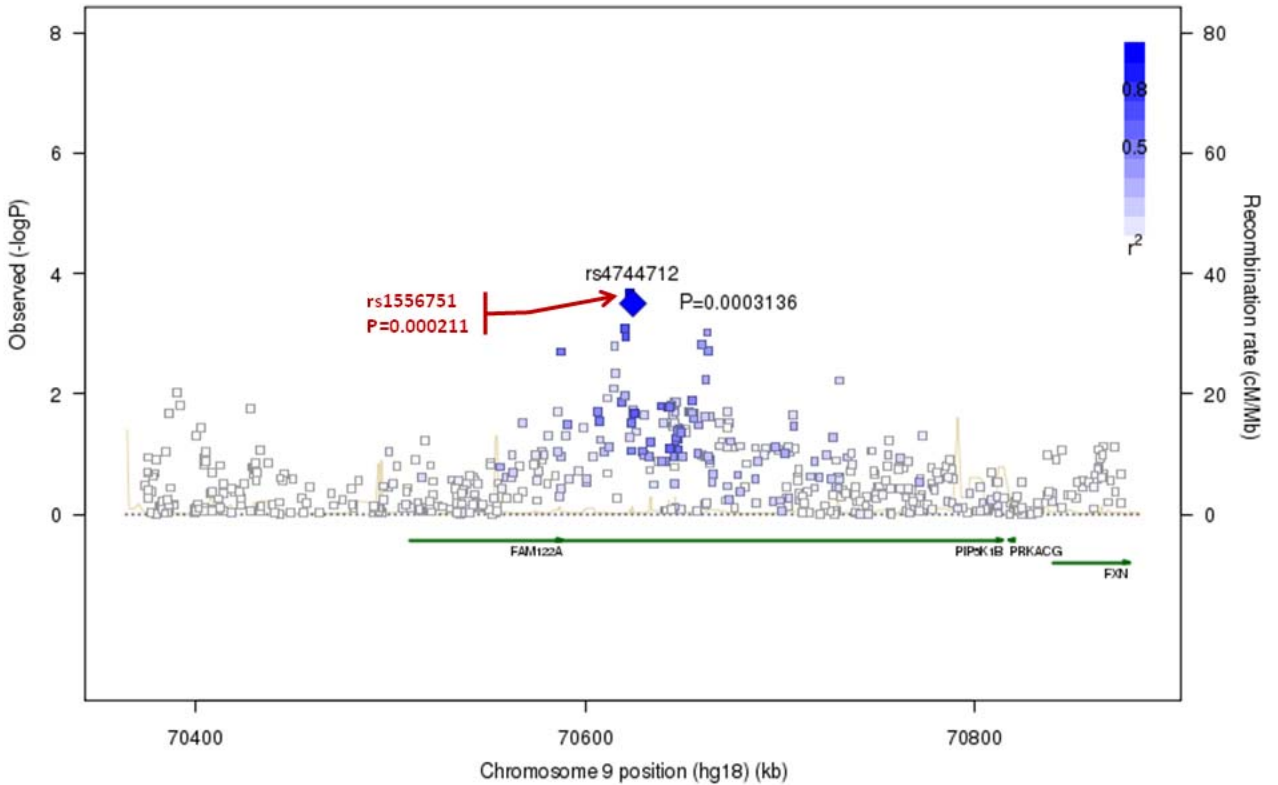

rs10774021 ( YRI )

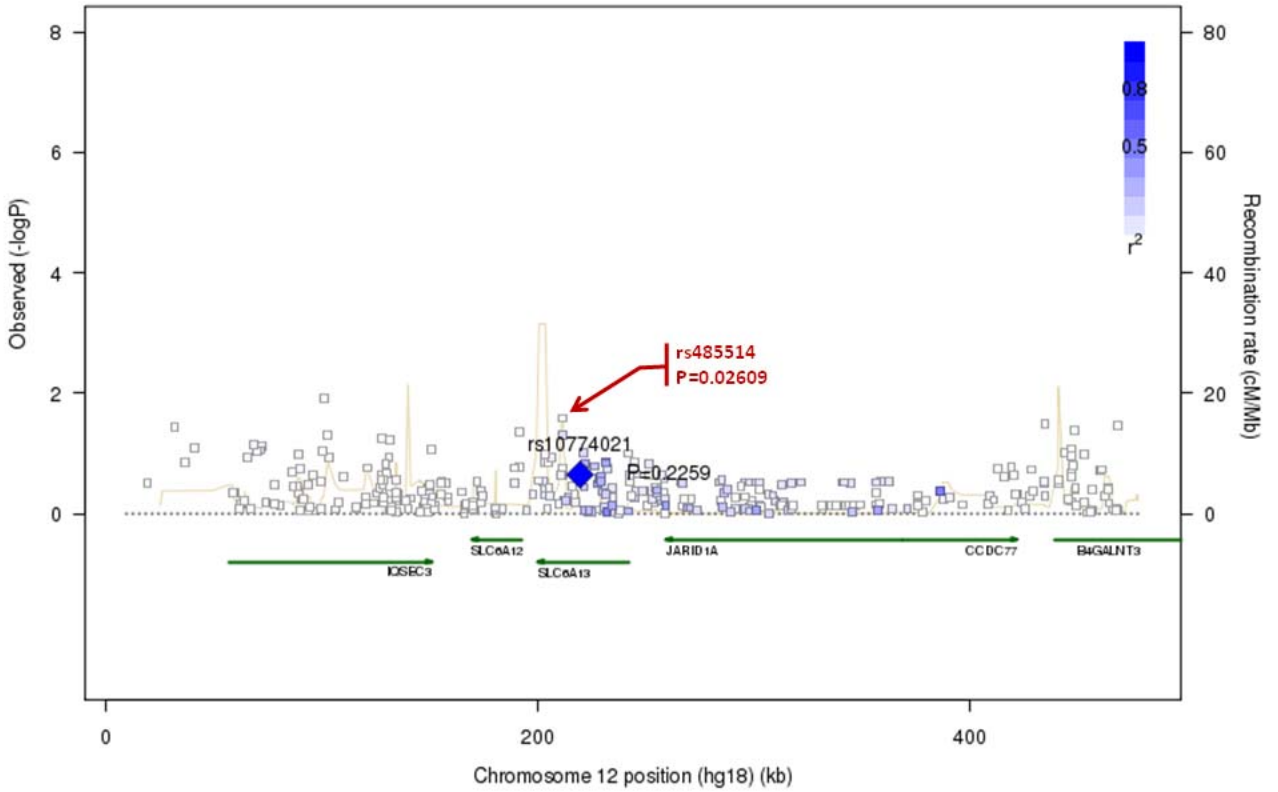

rs653178 ( YRI )

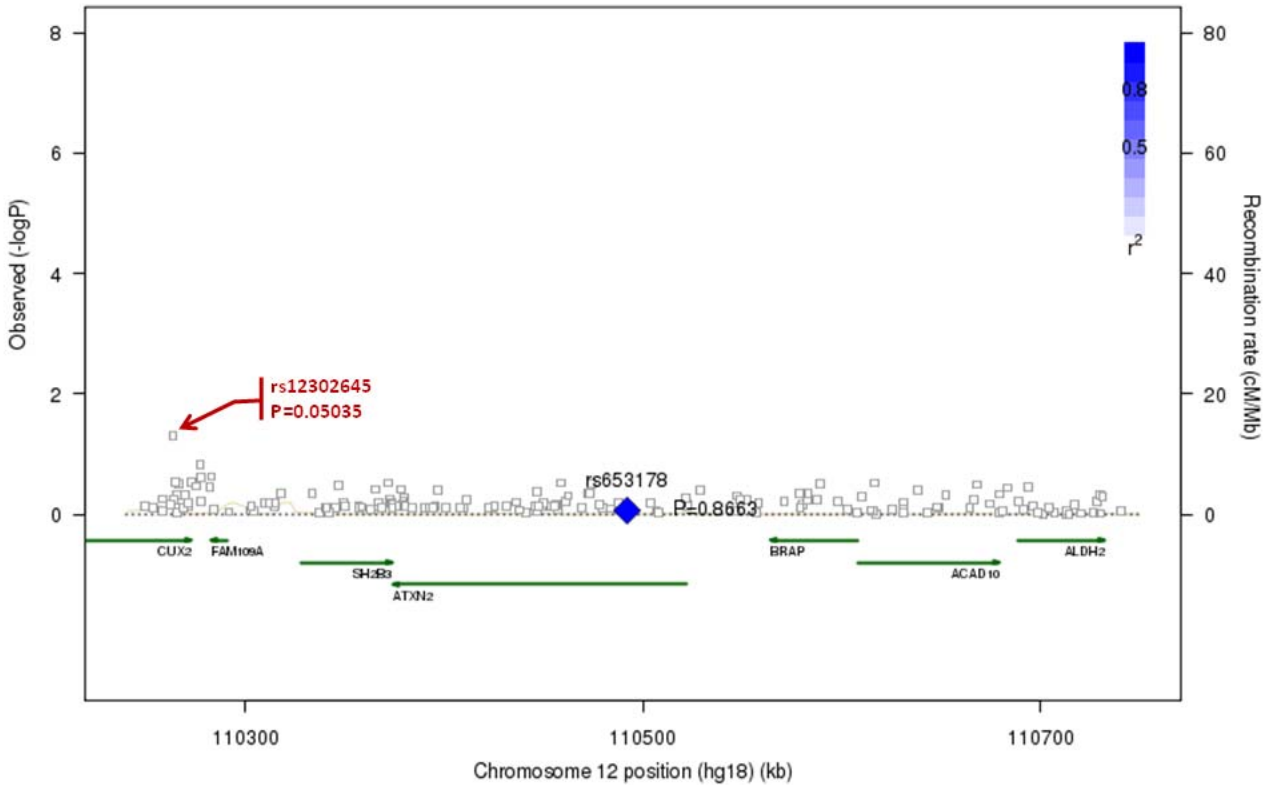

rs2453533 ( YRI )

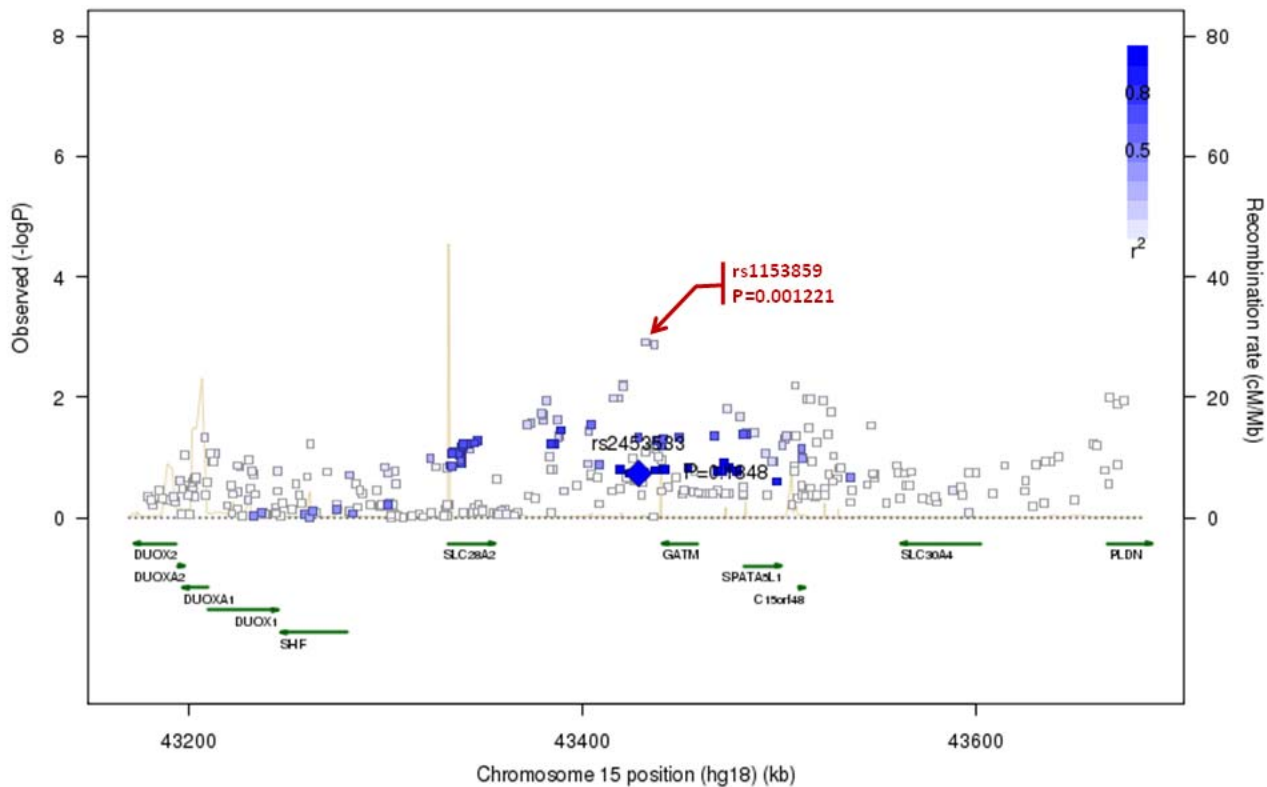

rs491567 ( YRI )

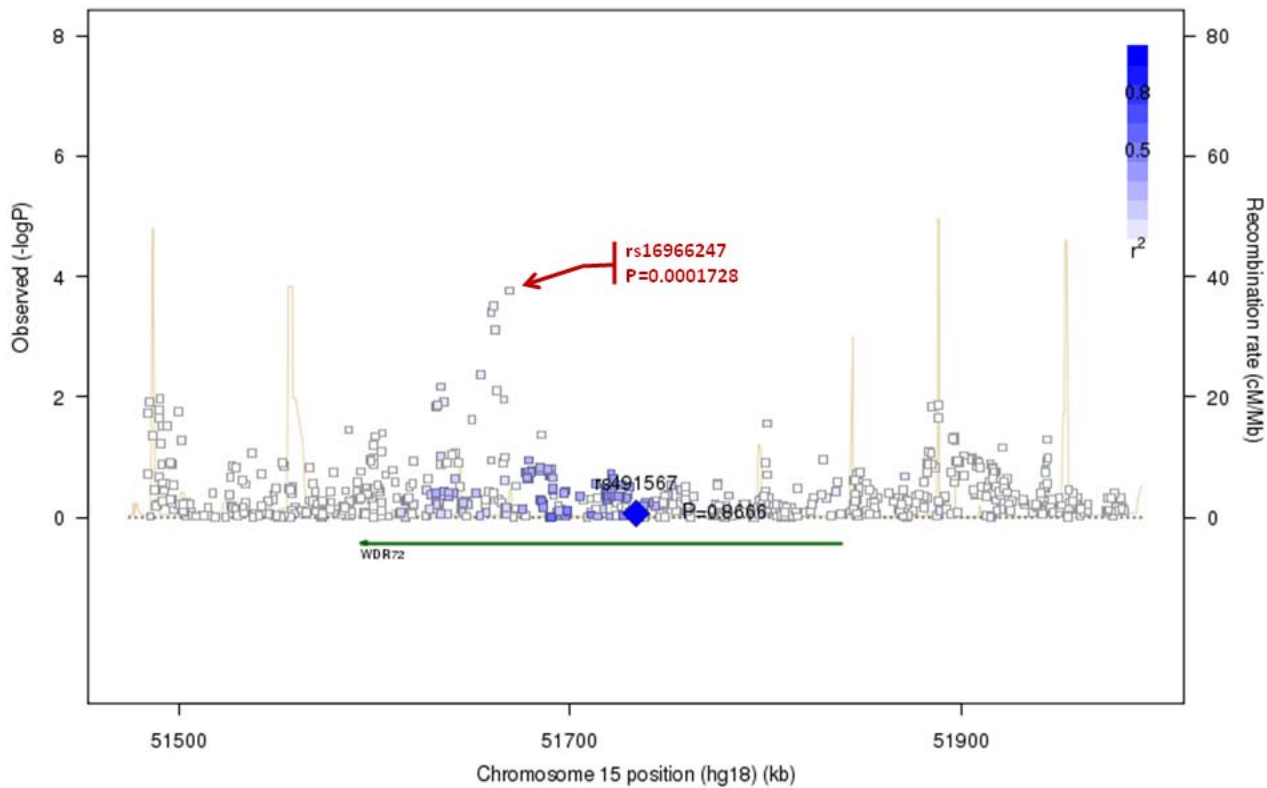

rs1394125 ( YRI )

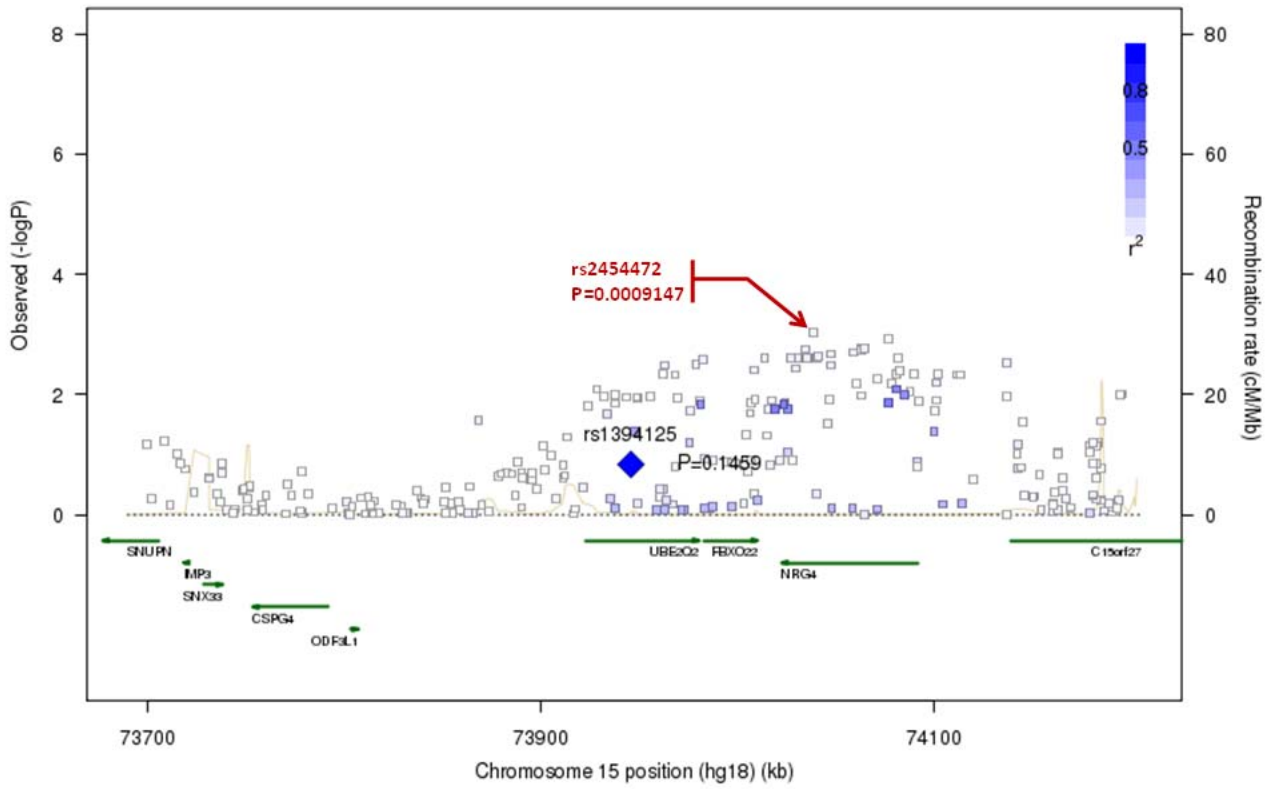

rs4293393 ( YRI )

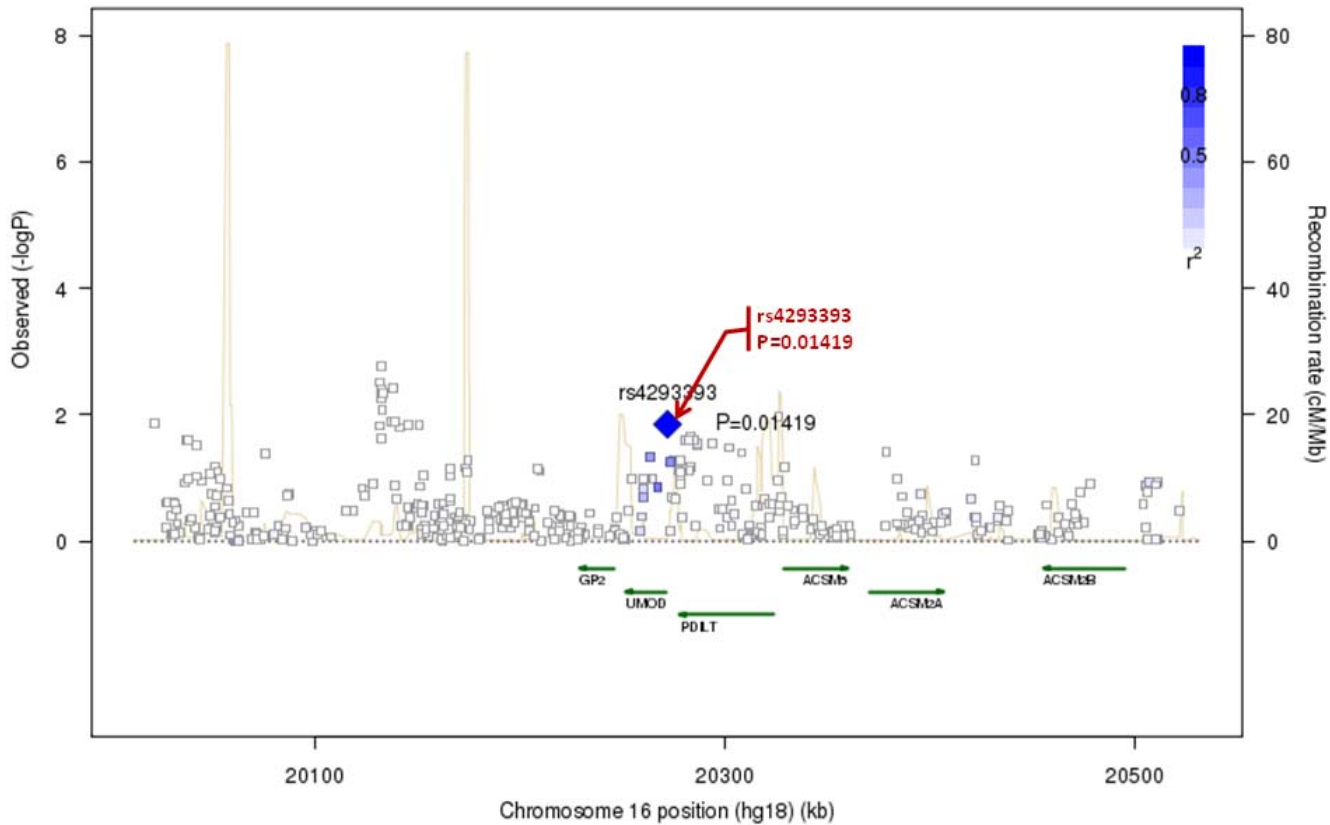

rs9895661 ( YRI )

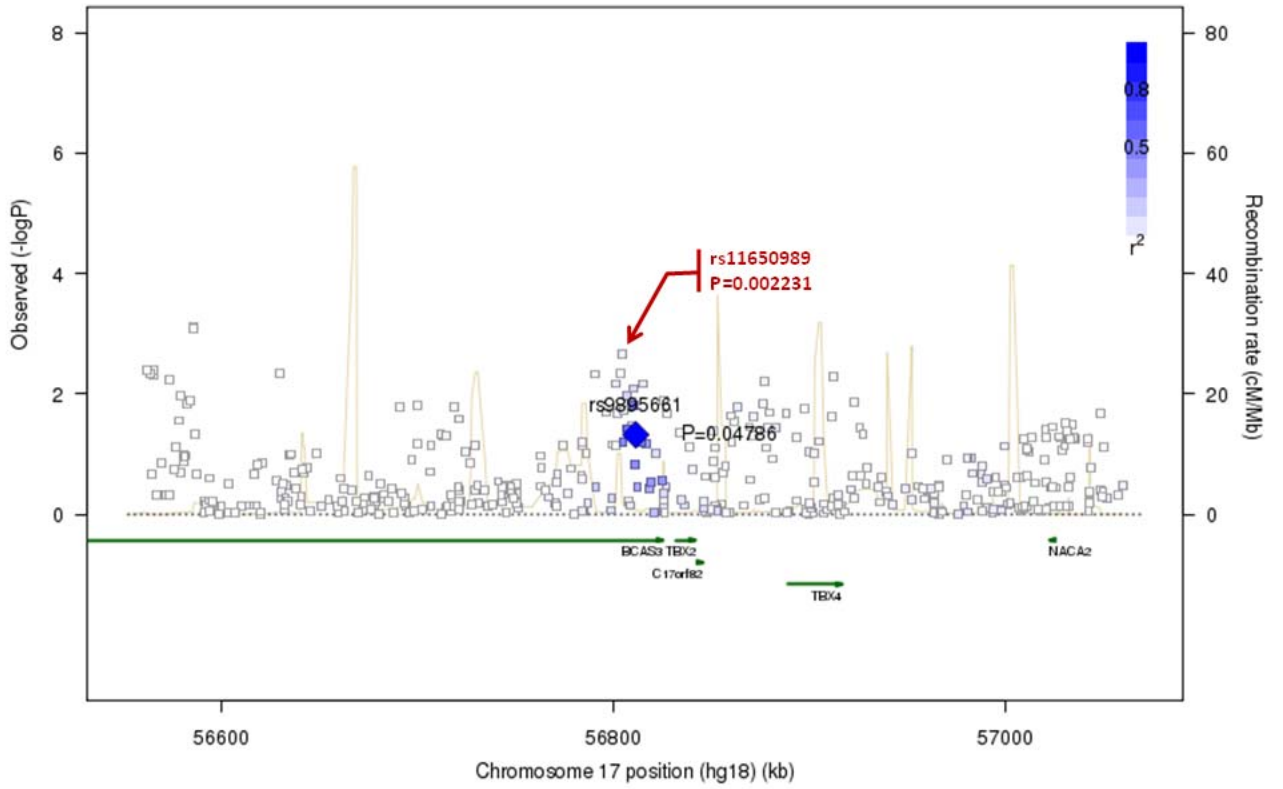

Supplement: pgen.1002264.s003.pdf [file pgen.1002264.s003.pdf]
